# Supplementary material for: Fossilized melanosomes and the colour of Cretaceous dinosaurs and birds
Source: Springer Nature journal article supplement (doi:10.1038/nature08740), 2010-01-27
Supplement: 41586_2010_BFnature08740_MOESM264_ESM.pdf [file 41586_2010_BFnature08740_MOESM264_ESM.pdf]

## SUPPLEMENTARY INFORMATION

**Melanosomes in an extant bird**

Flank and breast feathers were plucked with tweezers from a male specimen of the zebra finch *Taeniopygia guttata castanotis* (National Museum of Ireland – Natural History Division: NMI 1909.329.1) (Fig. S1a). The coloration of these feathers in this taxon is melanin-based<sup>1</sup>. Breast feathers contain predominantly eumelanin, and flank feathers very high concentrations of phaeomelanin. Breast feathers are either uniformly black or show black and white striping (Fig. S1a); the former were used herein (Fig. S1b). The distal half of flank feathers is brown-coloured<sup>1</sup> with two white, unpigmented, spots; otherwise, the barbs and barbules are pigmented evenly (Fig. S1c).

**Method.** Feathers were placed in an ultrasonic bath in distilled water for 10 minutes to remove surface detritus, and then air-dried on a 50°C hotplate. The feathers were cut in two transversely and the proximal part discarded; the pigmented parts of samples from flank feathers thus exhibited only brown colours. The rachis was separated from the rest of the feather using a scalpel, and discarded. To fracture the barbs and barbules, the remainder was mounted between two glass slides and ground lightly by manually rotating one slide past the other. Samples were then mounted on a pin stub, gold-coated, and examined using SEM (see Materials and Methods).

**Results.** Only rod-shaped eumelanosomes were identified in breast feathers (Fig. S1b, d-e). The brown-coloured distal part of the flank feathers (Fig. S1c) revealed only sub-spherical melanosomes (Fig. S1f-i). The sub-spherical melanosomes are interpreted as phaeomelanosomes, as previous biochemical analyses have recorded very high abundances of phaeomelanin in flank feathers<sup>1</sup>. It is likely that both phaeomelanosomes and eumelanosomes occur within a single feather (eumelanin occurs in low concentrations in flank feathers<sup>1</sup>). However, the colour of the feather clearly corresponds to the most abundant type of melanosome. There is thus a correlation between the shape of the melanosome and feather colour. This, which has been recorded previously<sup>2</sup>, forms the basis for our interpretations of colour in the fossil birds and theropods.

**High decay resistance of melanosomes**

It is well documented<sup>3,4</sup> that melanized feathers are more resistant to bacterial degradation than non-melanized feathers. It has also been shown<sup>5</sup> that melanized feathers are more abrasion resistant. Liu and Simon<sup>6</sup> demonstrated that eumelanin is resistant to chemical degradation. Both eumelanosomes and phaeomelanosomes are routinely extracted from inside keratinous

substrates such as hair using various methods of acid/ base extraction, indicating their strong resistance to chemical degradation; alternative methods using enzymatic extraction retain not only the physical structure, but alter the chemistry less (ref. 7, and references therein). Further, recent studies on the taphonomy of hair samples in archaeological contexts<sup>8</sup>, show that melanin and melanosomes are resistant to decay, even more so than keratin: “Indeed, in the most severe cases of microbial destruction to the hair shaft, the complete loss of keratinaceous material was associated with concomitant survival of melanin pigment granules.”

- 1 McGraw, K. J. & Wakamatsu, K. Melanin basis of ornamental feather colors in male zebra finches. *Condor* **106**, 686-690 (2004).
- 2 McGraw, K. J. in *Bird Coloration. I. Mechanisms and Measurements* (eds Hill, G. E. & McGraw, K. J.) 243–294 (Harvard University Press, Cambridge, 2006).
- 3 Goldstein, G., Flory, K. R., Browne, B. A., Majid, S., Ichida, J. M. & Burt, E. H. Bacterial degradation of black and white feathers. *Auk* **121**, 656-659. (2004).
- 4 Gunderson, A.R., Frame, A. M., Swaddle, J. P. & Forsyth, M. H. Resistance of melanized feathers to bacterial degradation: is it really so black and white? *J. Avian Biol.* **39**, 539-545 (2008).
- 5 Bonser, R. H. C. Melanin and the abrasion resistance of feathers. *Condor* **97**, 590-591 (1995).
- 6 Liu, Y. & Simon, J. D. Isolation and biophysical studies of natural eumelanins: applications of imaging technologies and ultrafast spectroscopy. *Pigment Cell Res.* **16**, 606-618 (2003).
- 7 Liu, Y., Kempf, V. R., Nofsinger, J. B., Weinert, E. E., Rudnick, M., Wakamatsu, K., Ito, S., & Simons, J. D. Comparison of the structural and physical properties of human hair eumelanin following enzymatic or acid/base extraction. *Pigment Cell Res.* **16**, 355-365 (2003).
- 8 Wilson, A. S., Dodson, H. I., Janaway, R. C., Pollard, A. M., & Tobin, D. J. Selective biodegradation in hair shafts derived from archaeological, forensic and experimental contexts. *Br. J. Dermatol.* **157**, 450–457 (2007).
